# Supplementary material
Source: publisher site journal article supplement (https://www.dovepress.com/article/426558)
Supplement: Supplementary file 1 [file get_supplementary_file.php]

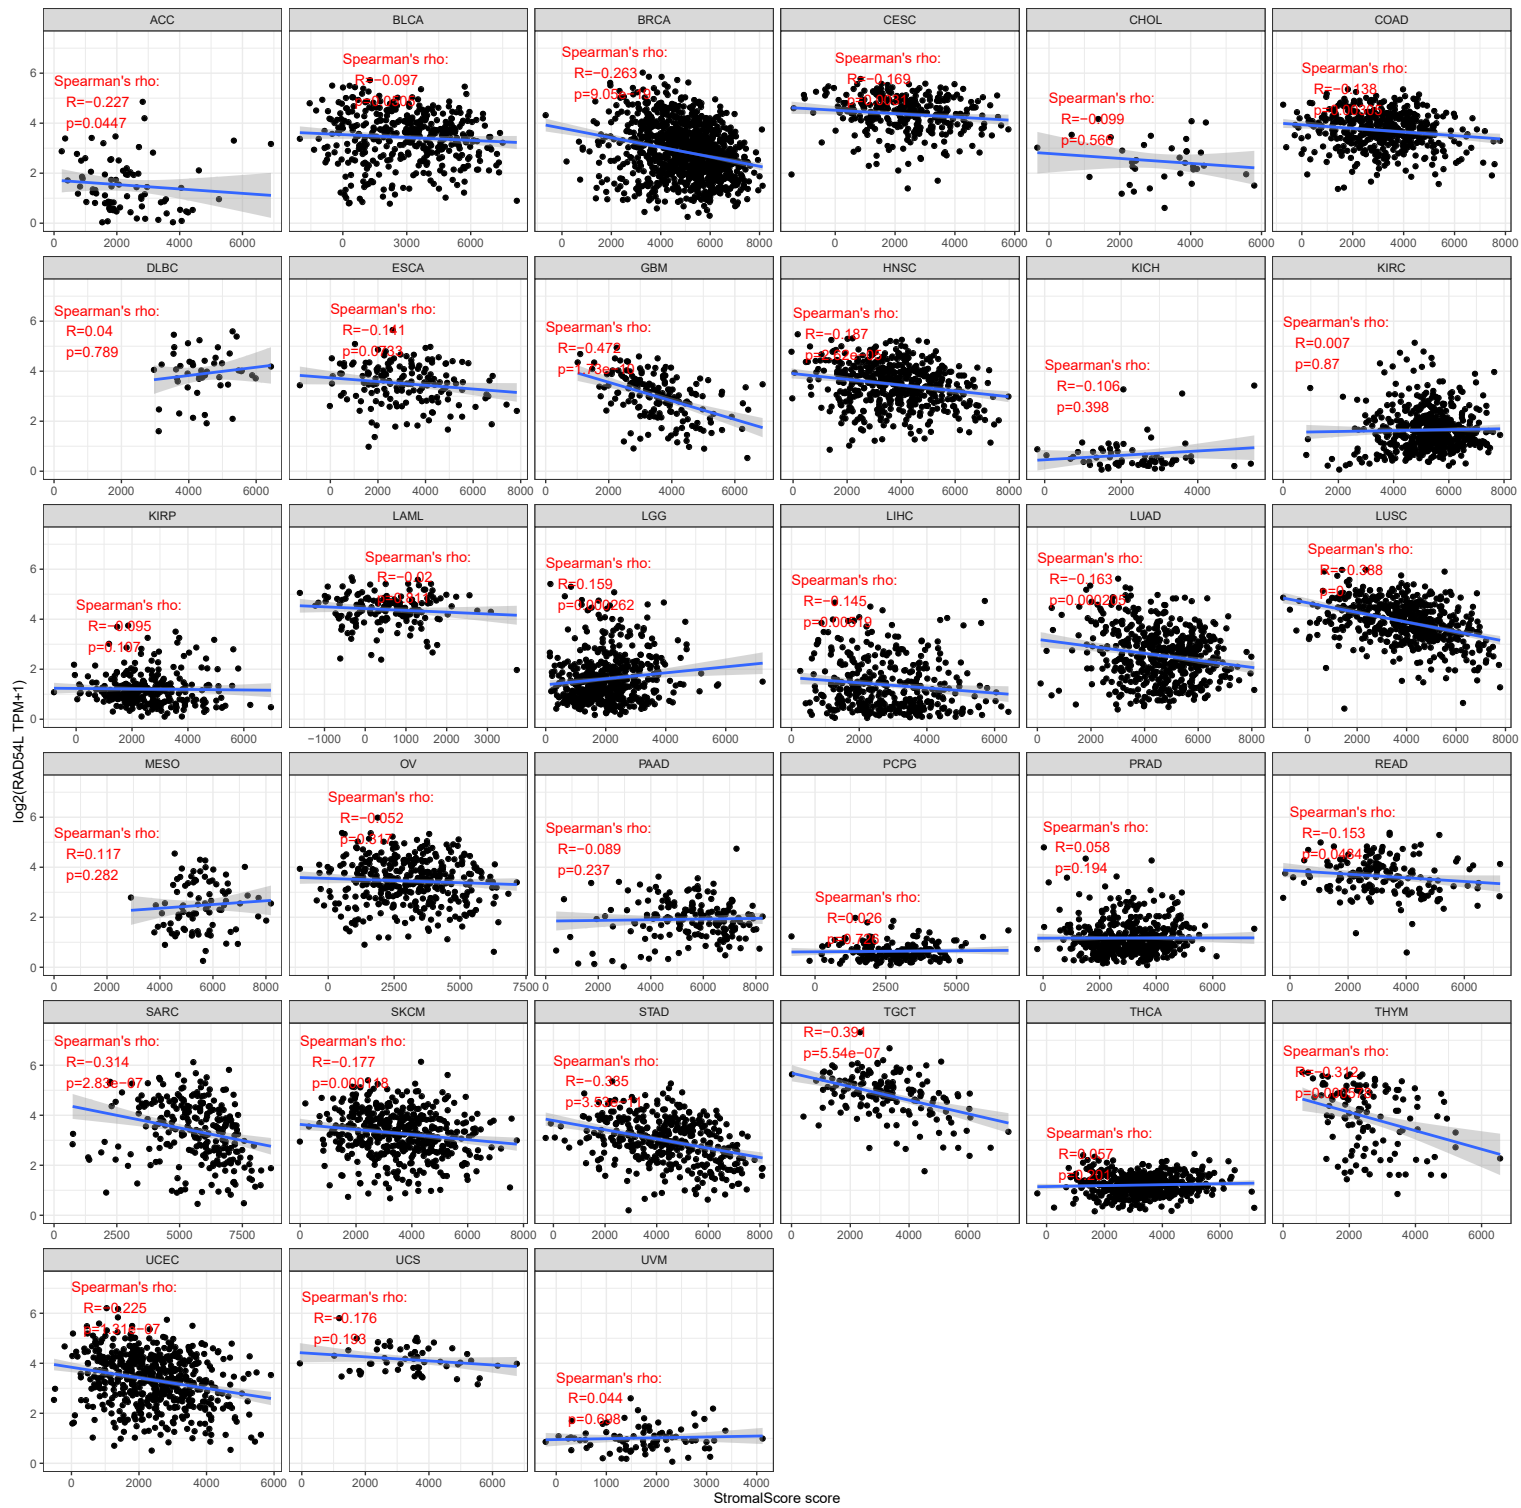

Figure S1 Correlation of RAD54L expression levels with stromal score in pan-cancer.

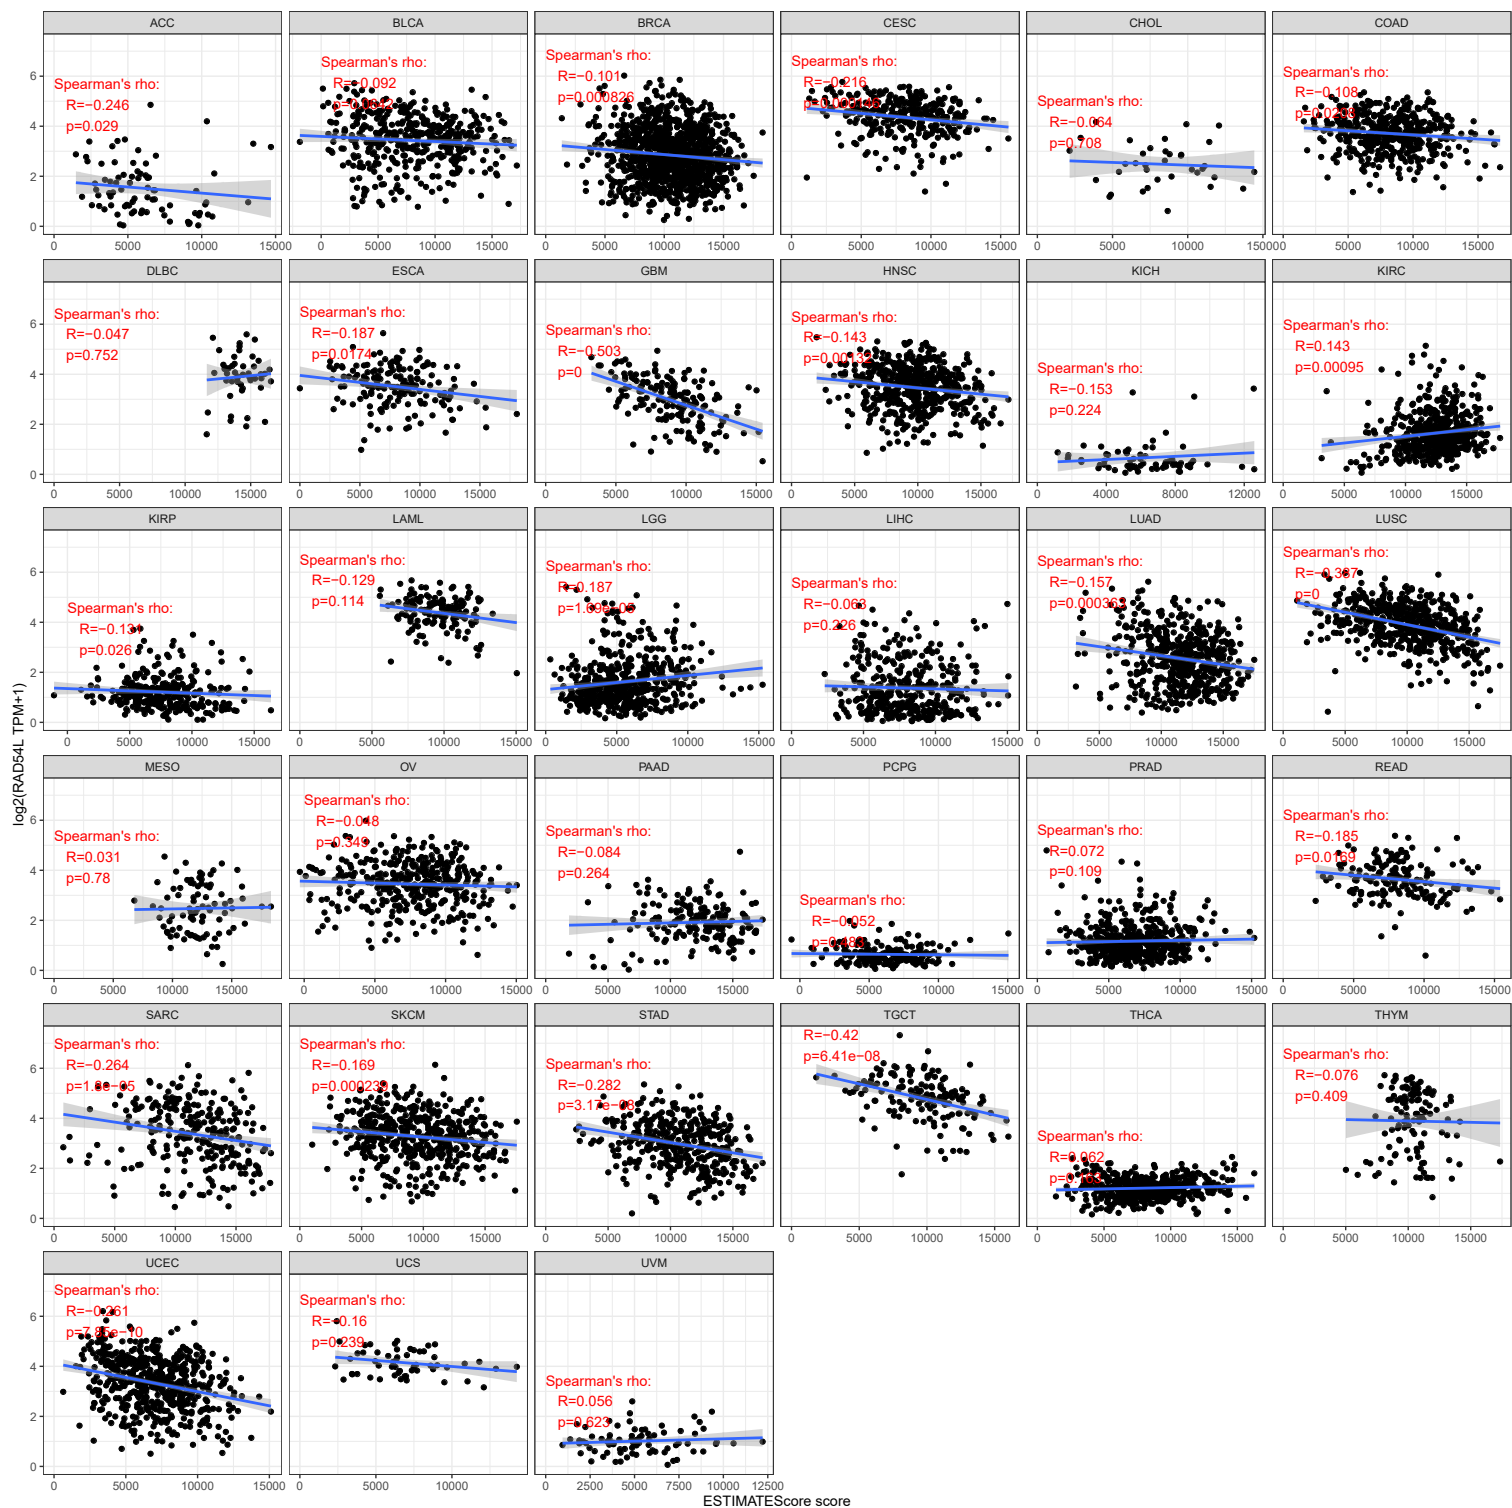

Figure S2 Correlation of RAD54L expression levels with ESTIMATE score in pan-cancer.
